# Supplementary material for: HPVE6-USP46 Mediated Cdt2 Stabilization Reduces Set8 Mediated H4K20-Methylation to Induce Gene Expression Changes
Source: MDPI journal article supplement (doi:10.3390/cancers14010030), 2021-12-22
Supplement: s1 [file s1]

## Supplementary -1

### (A) Set8 antibody specificity

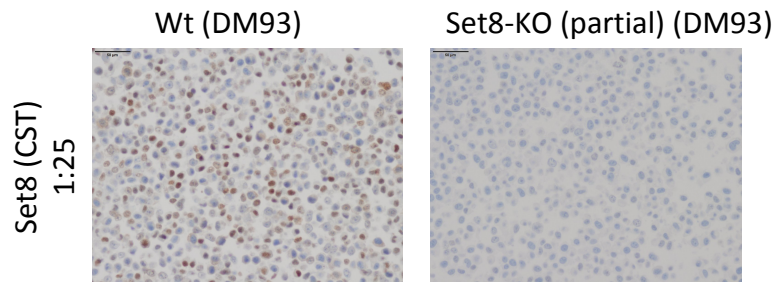

### (B) Ki67 staining pattern in normal and cancerous pairs

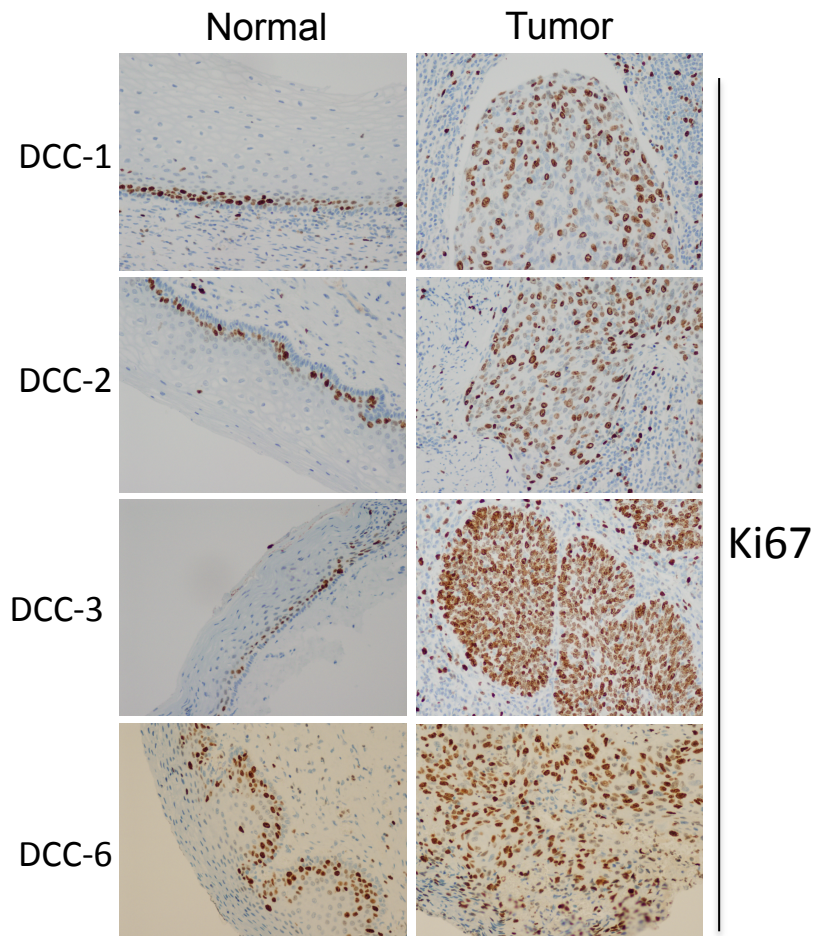

# Supplementary-2

(A)

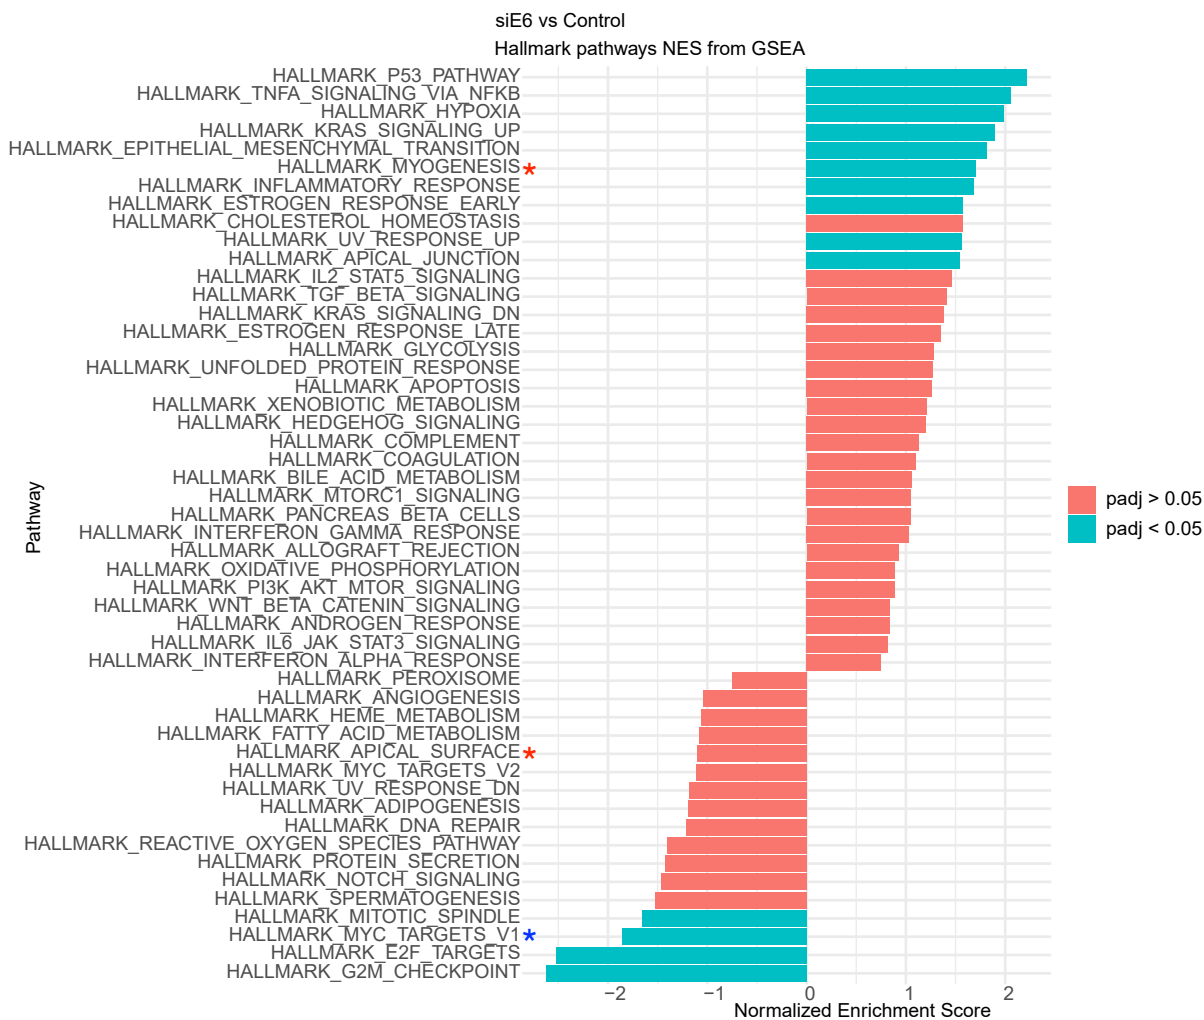

(B)

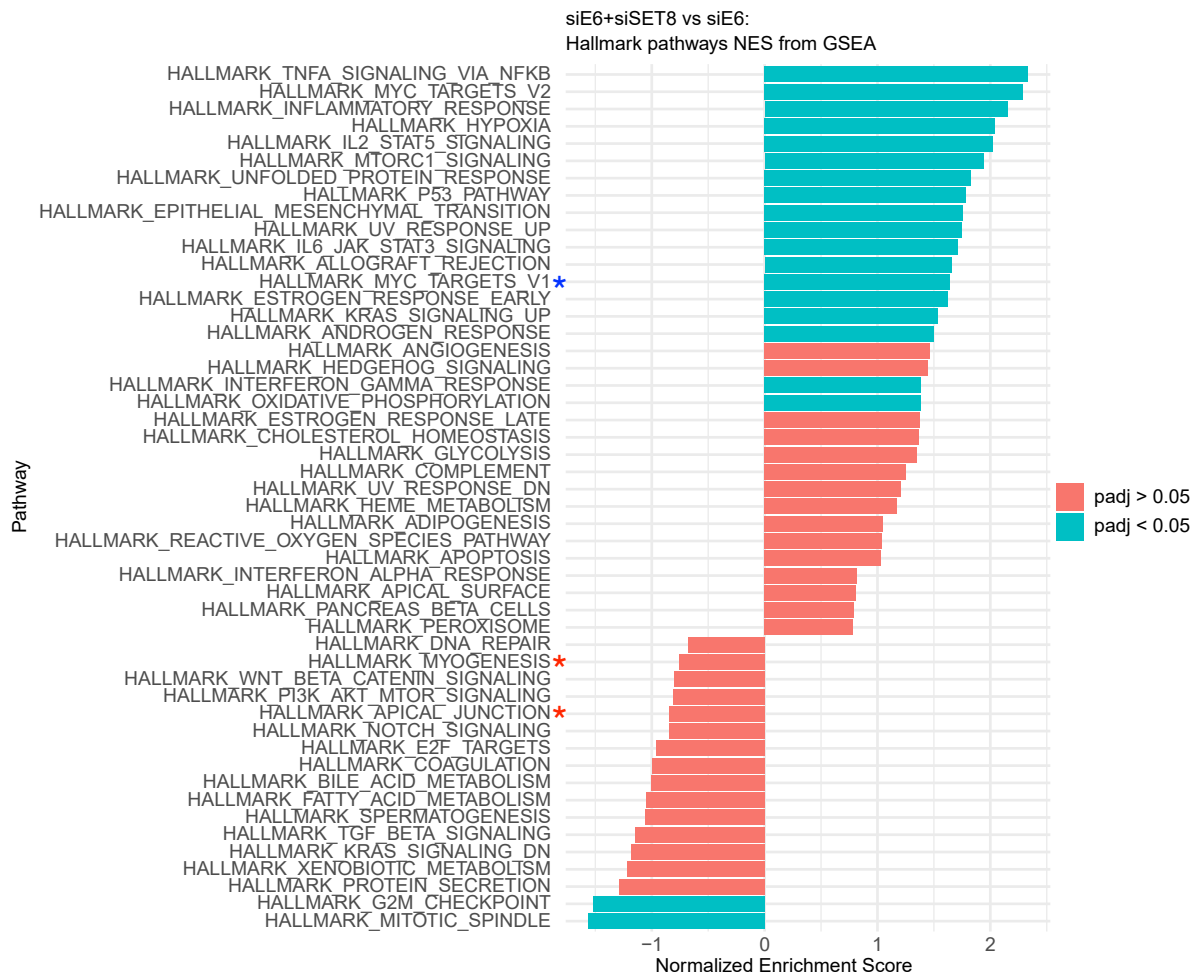

Supplementary-3

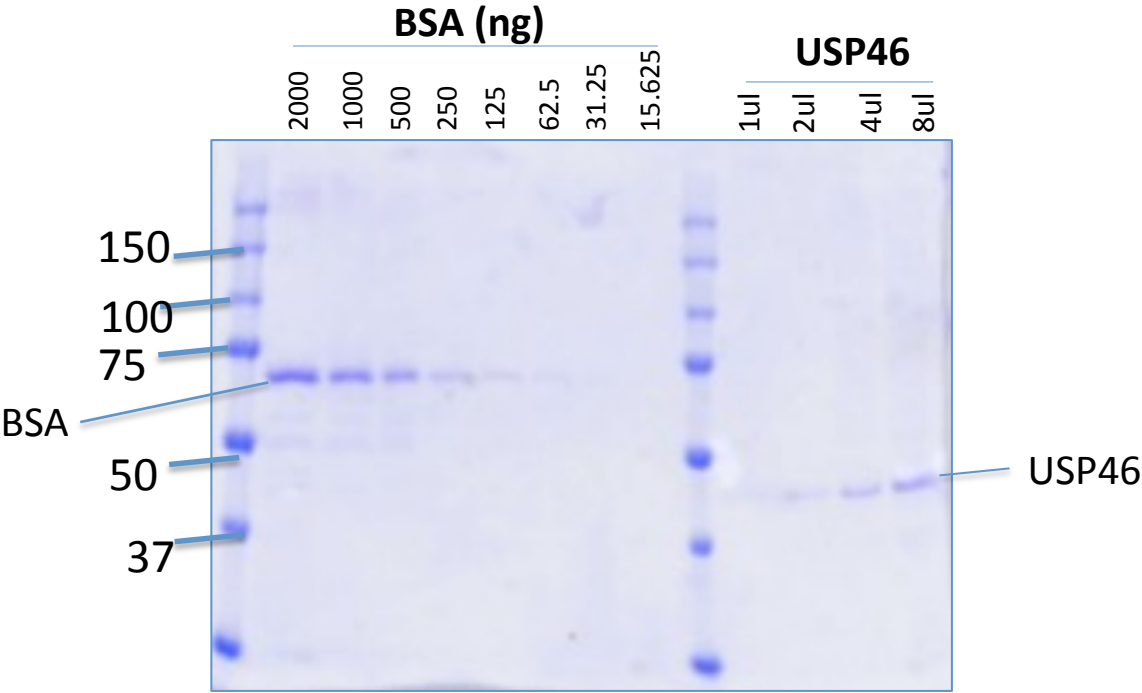

# Supplementary Tables

## (S1) Data table

| Sample name          | Raw reads | Clean reads | Raw bases | Clean bases | Error rate(%) | Q20(%) | Q30(%) | GC content(%) |
|----------------------|-----------|-------------|-----------|-------------|---------------|--------|--------|---------------|
| SK01 (GI2-Contro)    | 71130612  | 70026436    | 10.7G     | 10.5G       | 0.03          | 97.86  | 94.16  | 51.31         |
| SK02 (siE6)          | 73431482  | 72178864    | 11G       | 10.8G       | 0.03          | 97.8   | 94.01  | 51.55         |
| SK03 (siE6 + siSet8) | 81704490  | 80268672    | 12.3G     | 12G         | 0.03          | 97.91  | 94.31  | 51.7          |
| SK04 (GI2-Contro)    | 83973274  | 82477644    | 12.6G     | 12.4G       | 0.03          | 96.85  | 91.88  | 51.09         |
| SK05 (siE6)          | 73744256  | 72293398    | 11.1G     | 10.8G       | 0.02          | 98.06  | 94.53  | 51.59         |
| SK06 (siE6 + siSet8) | 75703744  | 74508840    | 11.4G     | 11.2G       | 0.03          | 97.91  | 94.27  | 51.59         |
| SK07 (GI2-Contro)    | 73376218  | 72123184    | 11G       | 10.8G       | 0.03          | 97.79  | 93.98  | 51.01         |
| SK08 (siE6)          | 67527940  | 66287472    | 10.1G     | 9.9G        | 0.03          | 97.79  | 94     | 51.77         |
| SK09 (siE6 + siSet8) | 70788308  | 69651182    | 10.6G     | 10.4G       | 0.02          | 97.96  | 94.41  | 51.85         |

## (S2) Mapped reads

| Sample name           | SK01     | SK02     | SK03     | SK04     | SK05     | SK06     | SK07     | SK08     | SK09     |
|-----------------------|----------|----------|----------|----------|----------|----------|----------|----------|----------|
| Total reads           | 70026436 | 72178864 | 80268672 | 82477644 | 72293398 | 74508840 | 72123184 | 66287472 | 69651182 |
| Total mapped reads    | 67199286 | 68820950 | 76410802 | 77938064 | 68974080 | 71222798 | 69049858 | 63108728 | 66713024 |
| Uniquely mapped reads | 65875466 | 67520864 | 74949666 | 76379214 | 67677624 | 69868010 | 67692256 | 61917270 | 65408354 |
| Multiple mapped reads | 1323820  | 1300086  | 1461136  | 1558850  | 1296456  | 1354788  | 1357602  | 1191458  | 1304670  |
| Total mapping rate    | 95.96%   | 95.35%   | 95.19%   | 94.50%   | 95.41%   | 95.59%   | 95.74%   | 95.21%   | 95.78%   |
| Uniquely mapping rate | 94.07%   | 93.55%   | 93.37%   | 92.61%   | 93.62%   | 93.77%   | 93.86%   | 93.41%   | 93.91%   |
| Multiple mapping rate | 1.89%    | 1.80%    | 1.82%    | 1.89%    | 1.79%    | 1.82%    | 1.88%    | 1.80%    | 1.87%    |



## **Supplementary - 4 : Original Western blot**

Fig 1C

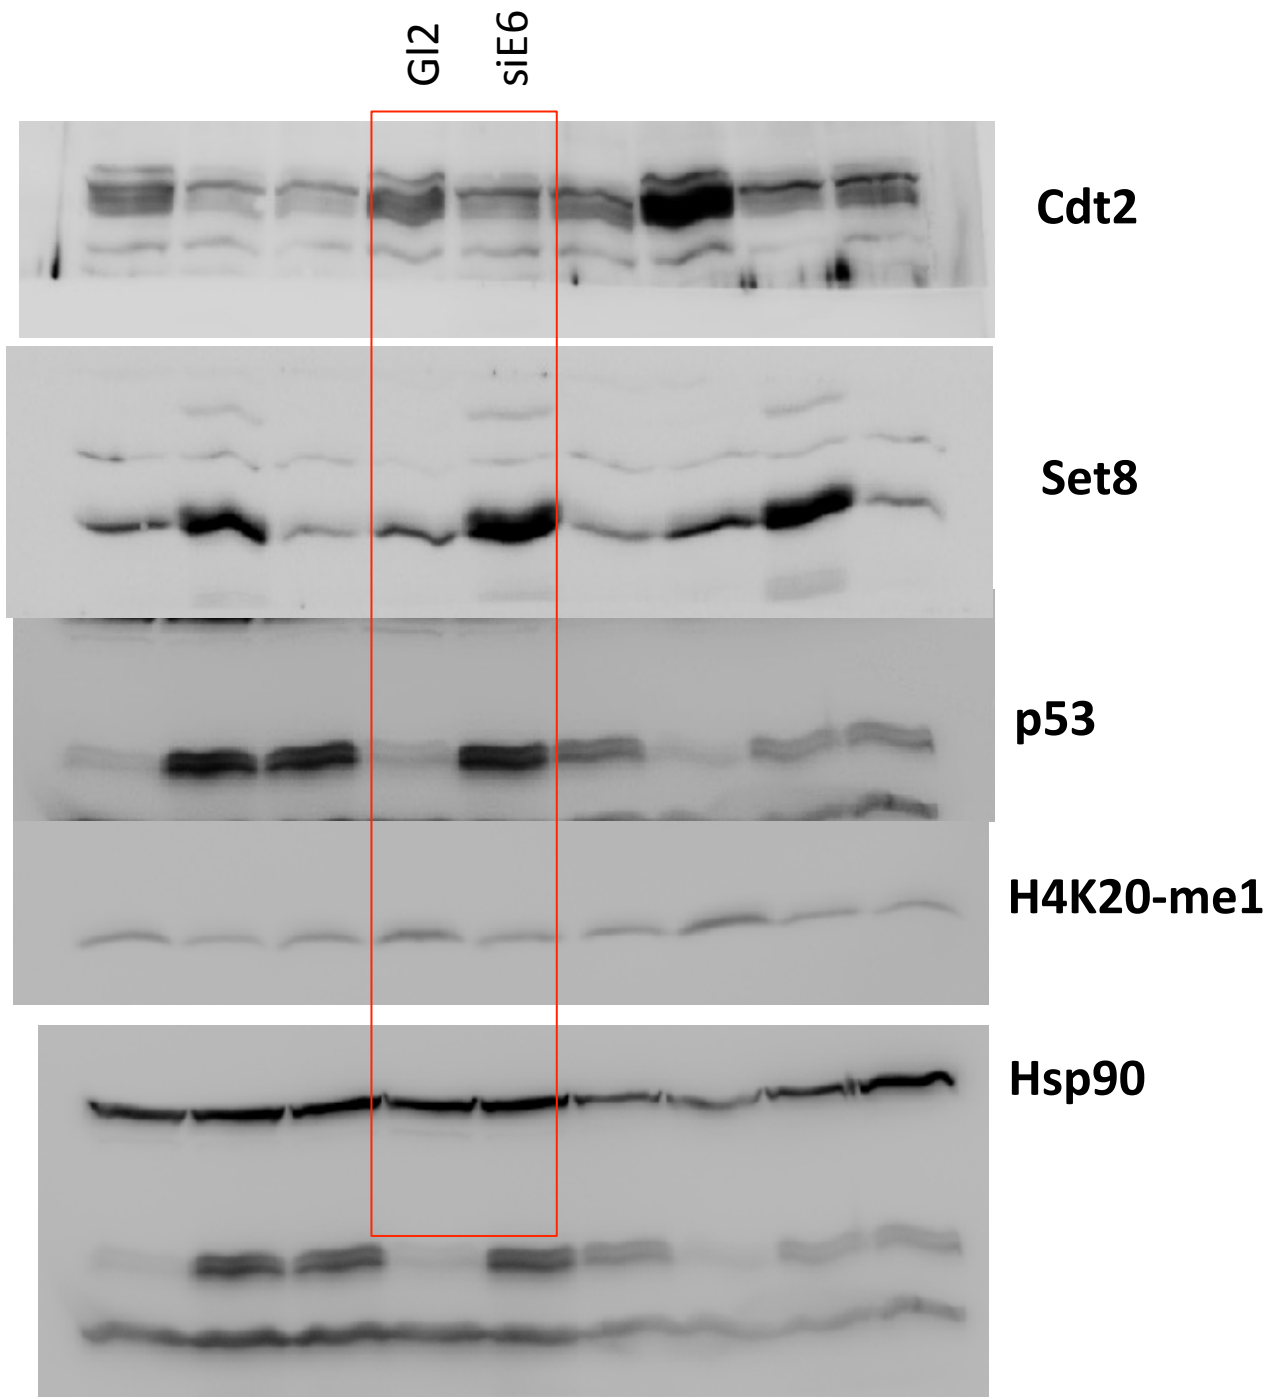

Quantifications  
presented in the main figure

Fig 1D

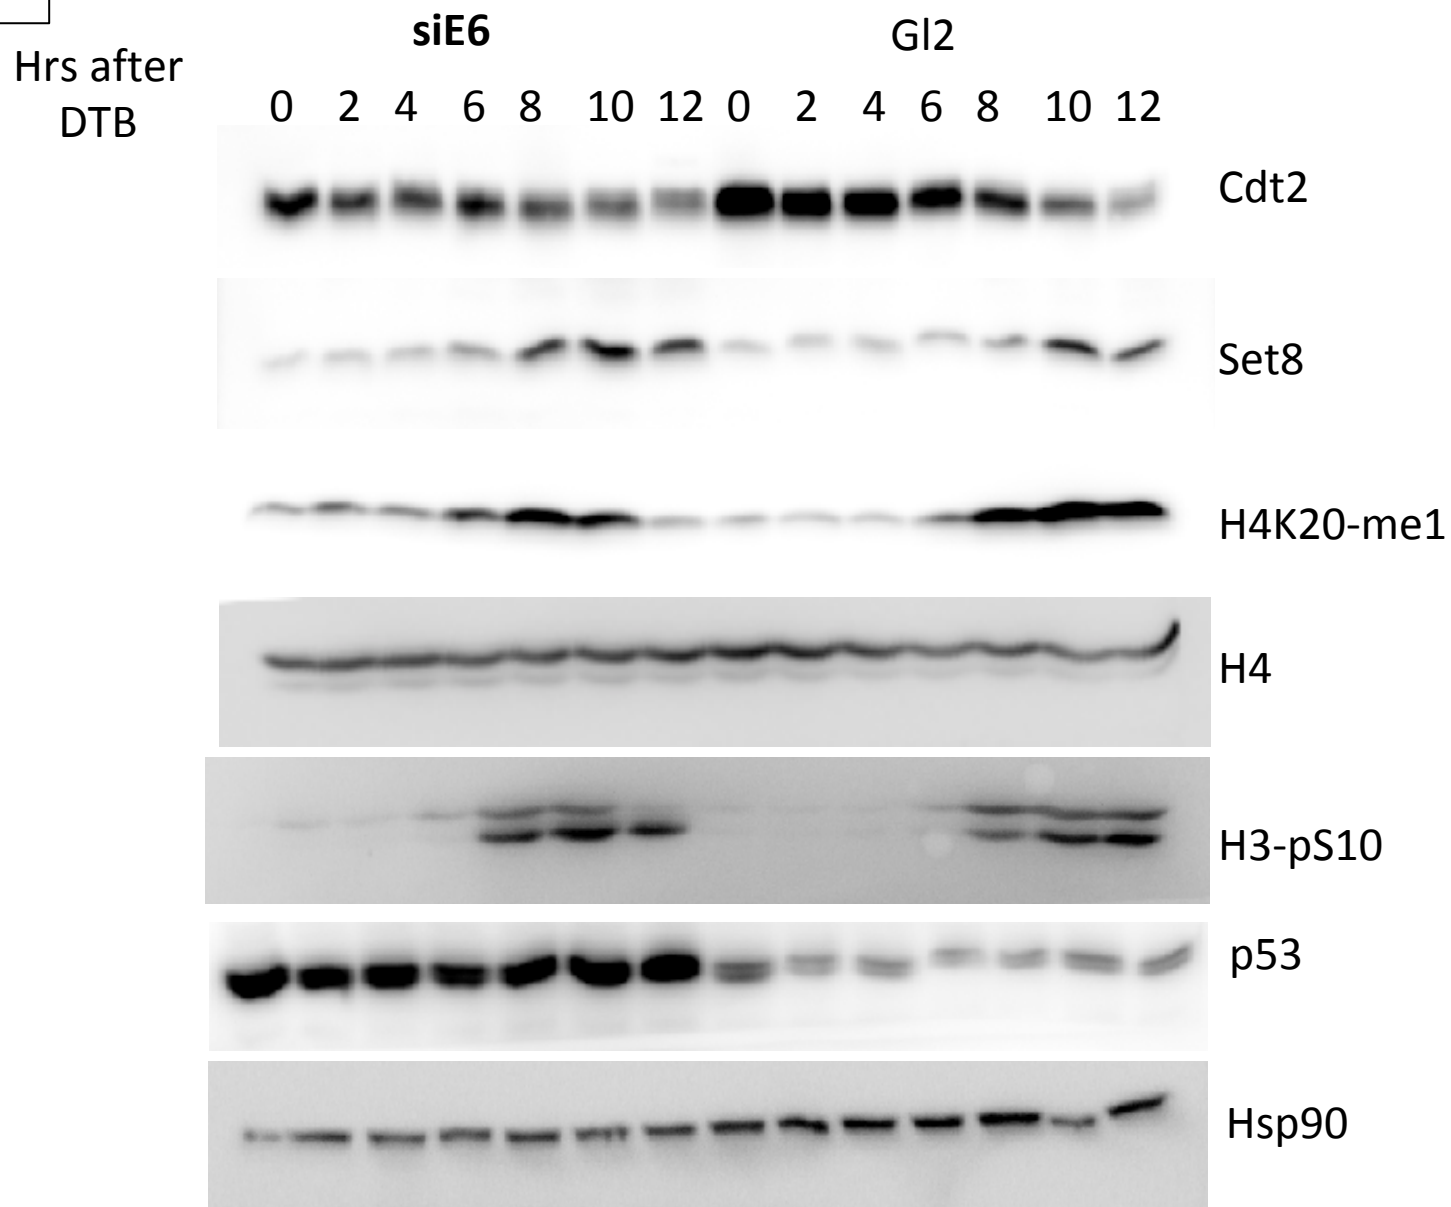

Fig- 1D – Quantification data

|                  | siE6 |      |      |      |       |       |       |  | GI2         |      |      |      |       |       |       |
|------------------|------|------|------|------|-------|-------|-------|--|-------------|------|------|------|-------|-------|-------|
|                  | 0    | 2    | 4    | 6    | 8     | 10    | 12    |  | 0           | 2    | 4    | 6    | 8     | 10    | 12    |
| <b>Cdt2</b>      | 1.37 | 0.77 | 0.72 | 0.78 | 0.61  | 0.57  | 0.48  |  | <b>1.00</b> | 0.96 | 1.19 | 1.28 | 0.98  | 0.79  | 0.37  |
| <b>Set8</b>      | 1.44 | 1.66 | 1.82 | 2.94 | 5.32  | 6.84  | 4.72  |  | <b>1.00</b> | 0.98 | 1.48 | 1.71 | 2.50  | 7.59  | 4.60  |
| <b>H4K20-me1</b> | 2.49 | 3.37 | 2.88 | 5.33 | 8.12  | 6.03  | 1.64  |  | <b>1.00</b> | 0.95 | 1.20 | 4.38 | 10.49 | 15.59 | 10.58 |
| <b>H4</b>        | 1.00 | 1.00 | 1.00 | 1.00 | 1.00  | 1.00  | 1.00  |  | <b>1.00</b> | 1.00 | 1.00 | 1.00 | 1.00  | 1.00  | 1.00  |
| <b>H3-pS-10</b>  | 0.52 | 1.24 | 0.98 | 3.08 | 18.84 | 20.23 | 11.63 |  | <b>1.00</b> | 0.48 | 0.85 | 4.01 | 14.97 | 23.69 | 19.10 |
| <b>p53</b>       | 3.87 | 2.31 | 2.27 | 2.05 | 2.00  | 2.11  | 1.85  |  | <b>1.00</b> | 0.55 | 0.74 | 0.54 | 0.57  | 1.05  | 0.73  |
| <b>Hsp90</b>     | 0.62 | 0.97 | 0.81 | 0.94 | 0.94  | 0.87  | 0.85  |  | <b>1.00</b> | 1.18 | 1.49 | 1.77 | 2.02  | 1.43  | 1.49  |

Table-1: Values indicating densitometry analysis for each probed band at different time points corresponding to Fig.-1D. Each timepoint was normalised first to respective H4 measurements and then to the measurement at 0 time point of GI2

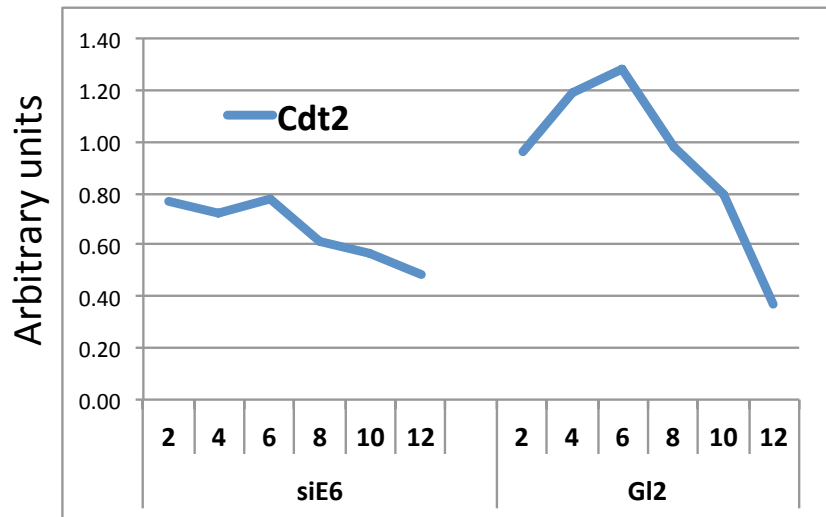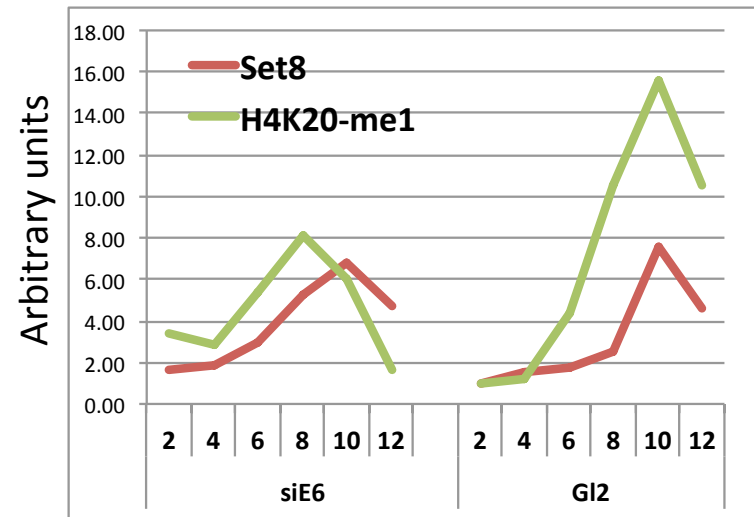

- Plots indicating the levels of Cdt2, Set8 and H4K20-me1 accumulation at different time points corresponding to Fig-1D . 0 -time point was eliminated because of aberrant values.

Fig 1E

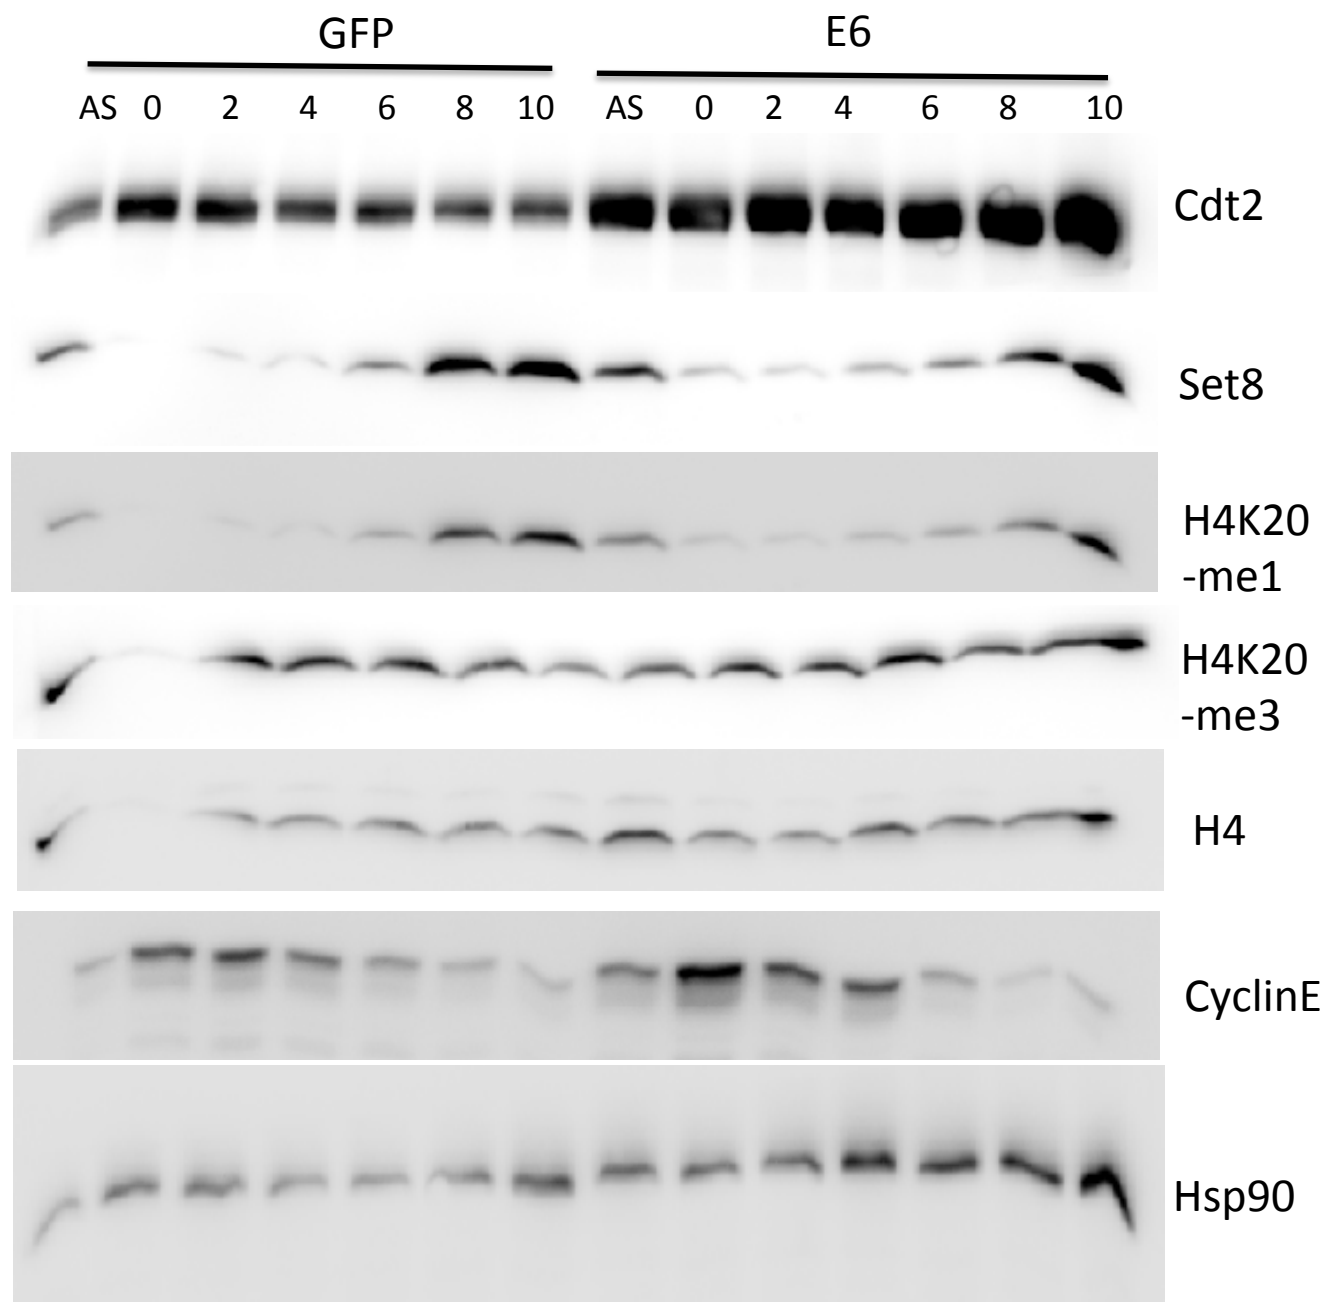

Fig- 1E – Quantification data

|                  | GFP  |      |      |      |      |      |  | E6   |      |      |      |      |      |
|------------------|------|------|------|------|------|------|--|------|------|------|------|------|------|
|                  | AS   | 2    | 4    | 6    | 8    | 10   |  | AS   | 2    | 4    | 6    | 8    | 10   |
| <b>Cdt2</b>      | 1.00 | 2.79 | 1.59 | 1.42 | 1.16 | 1.29 |  | 1.24 | 3.03 | 1.63 | 2.03 | 1.87 | 2.07 |
| <b>Set8</b>      | 1.00 | 0.20 | 0.28 | 0.87 | 2.69 | 2.94 |  | 0.91 | 0.21 | 0.29 | 0.55 | 1.10 | 2.05 |
| <b>H4K20-me1</b> | 1.00 | 0.27 | 0.31 | 0.91 | 3.16 | 3.85 |  | 0.95 | 0.26 | 0.35 | 0.60 | 1.27 | 2.57 |
| <b>H4K20-me3</b> | 1.00 | 1.67 | 1.43 | 1.11 | 0.79 | 0.49 |  | 0.40 | 1.16 | 0.90 | 0.71 | 0.72 | 0.74 |
| <b>H4</b>        | 1.00 | 1.00 | 1.00 | 1.00 | 1.00 | 1.00 |  | 1.00 | 1.00 | 1.00 | 1.00 | 1.00 | 1.00 |
| <b>Cyclin E</b>  | 1.00 | 8.18 | 4.17 | 2.34 | 1.32 | 0.75 |  | 2.03 | 5.97 | 2.23 | 1.25 | 0.36 | 0.37 |
| <b>Hsp90</b>     | 1.00 | 3.64 | 1.61 | 1.15 | 1.34 | 2.82 |  | 1.17 | 2.25 | 2.00 | 2.27 | 2.29 | 3.80 |

Table-2: Values indicating densitometry analysis for each probed band at different time points corresponding to Fig.-1E. Each timepoint was normalised first to respective H4 measurements and then to the measurement at Asynchronous (AS) time point of GFP transfected cells.

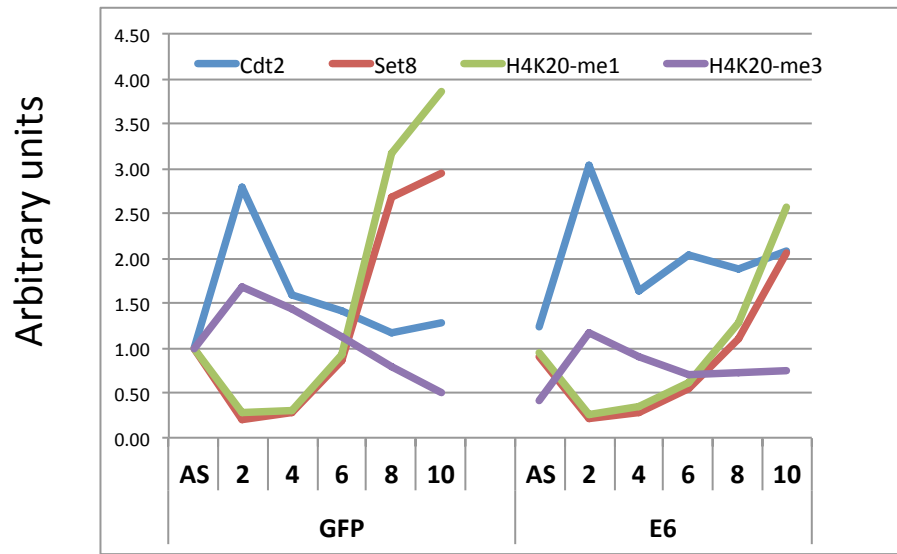

Plots indicating the levels of Cdt2, Set8, H4K20-me1 and H4K20-me3 accumulation at different time points corresponding to Fig-1D . 0 -time point was eliminated because of aberrant values

Fig 2A

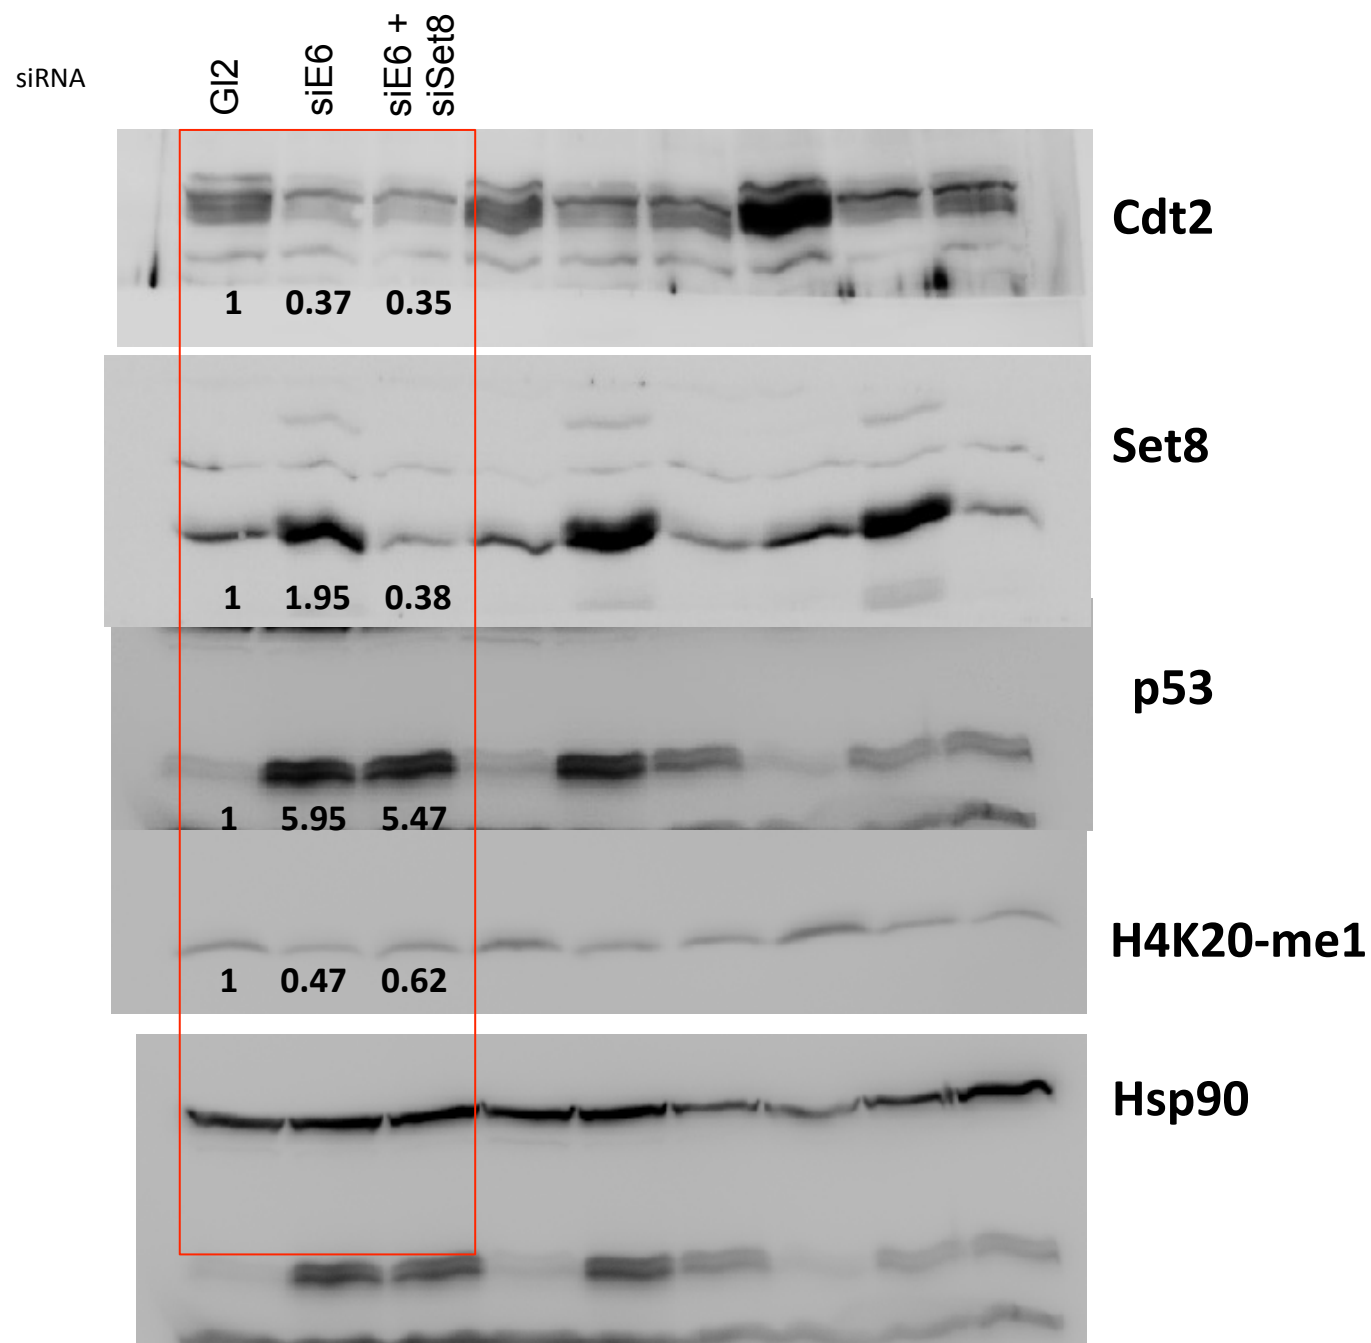



Fig- 4B

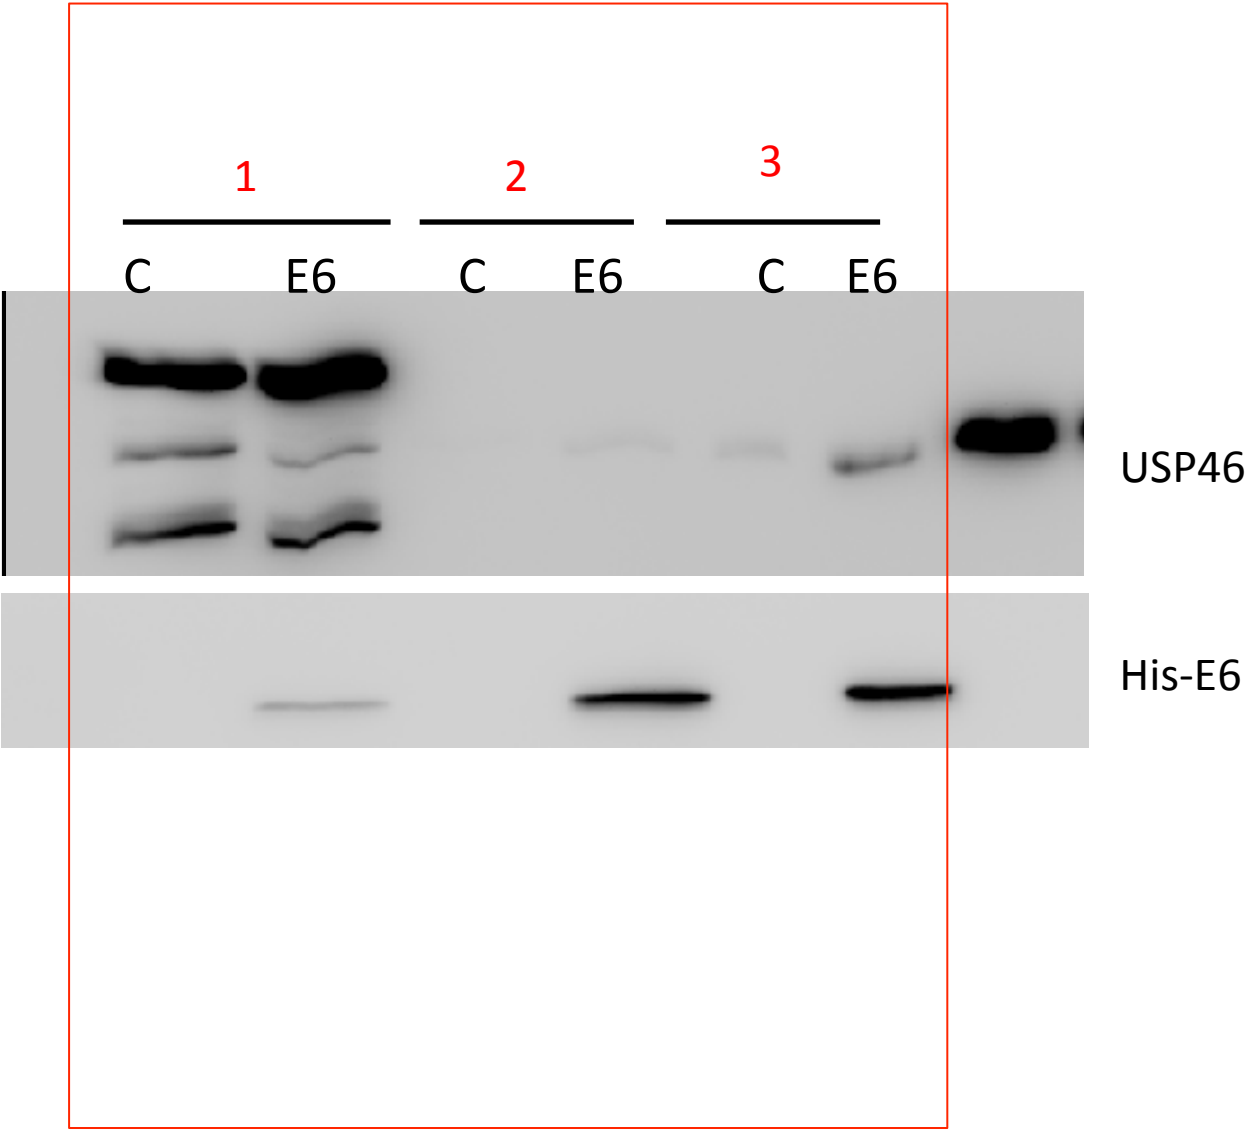

Immunoprecipitation experiment

FIG-5B

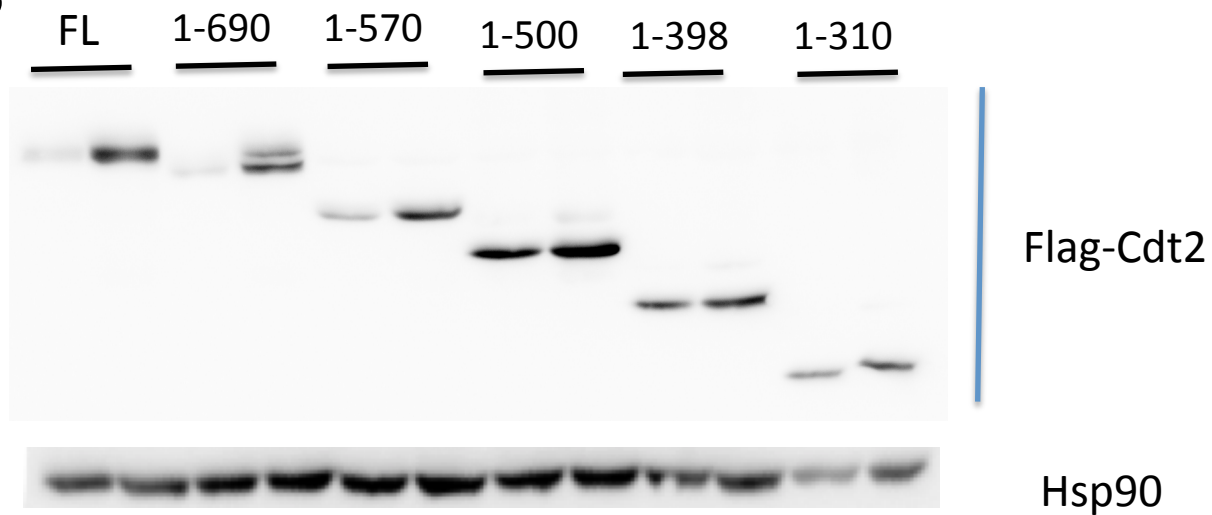

FIG-5B\_inset

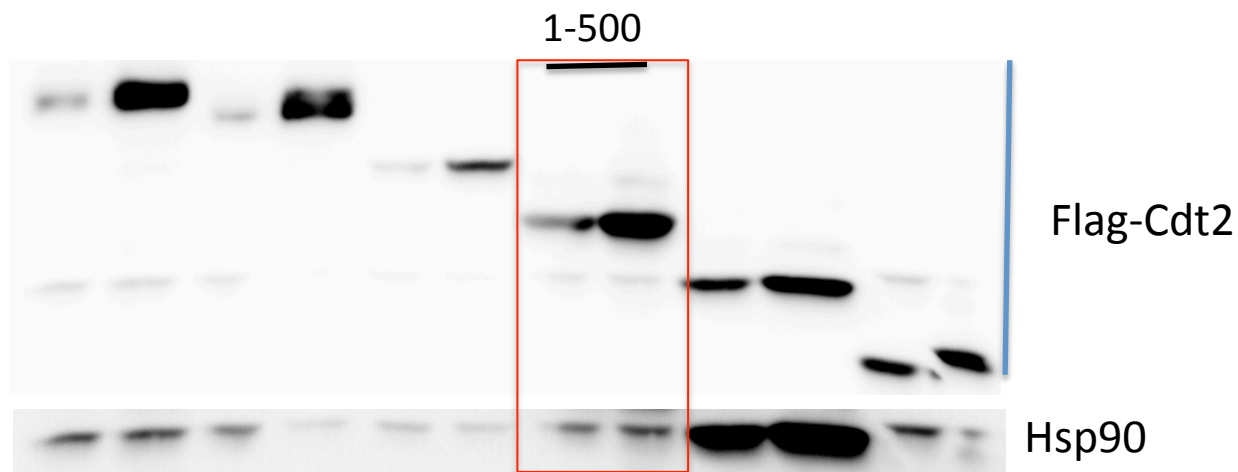

Fig- 5B – Quantification data

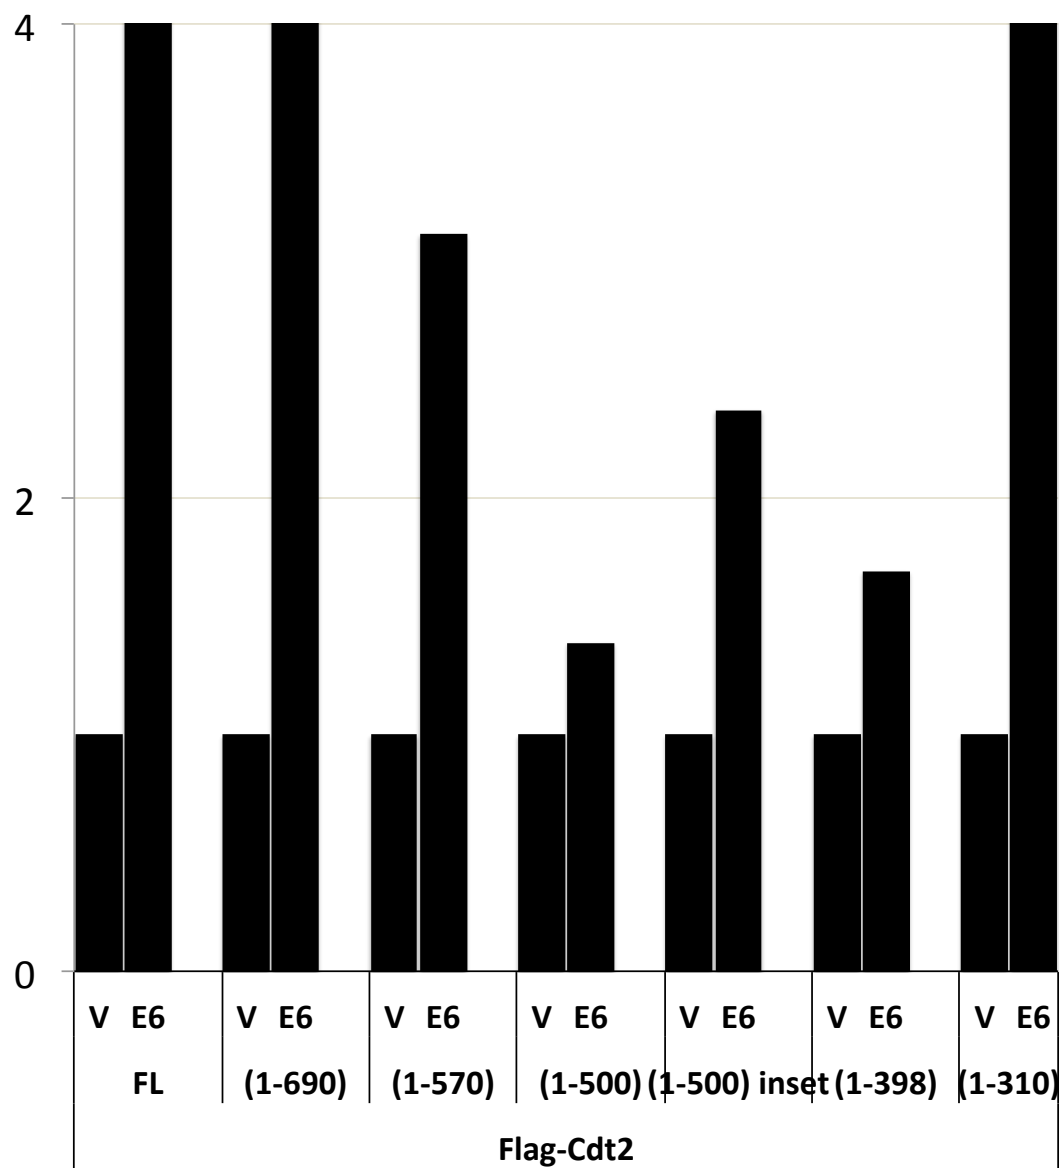

FIG-5D

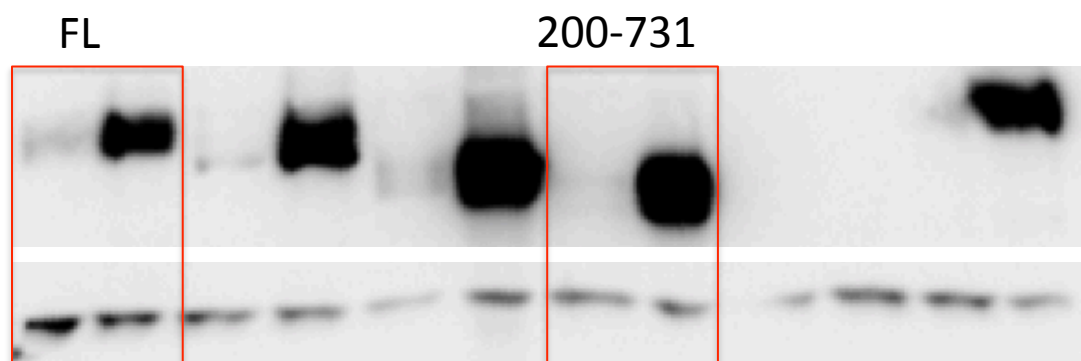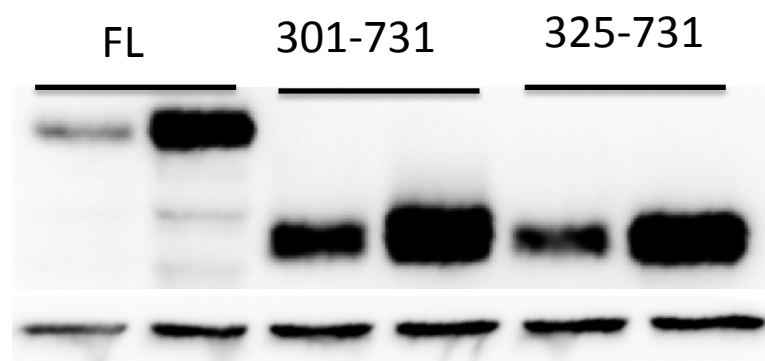

Fig- 5D – Quantification data

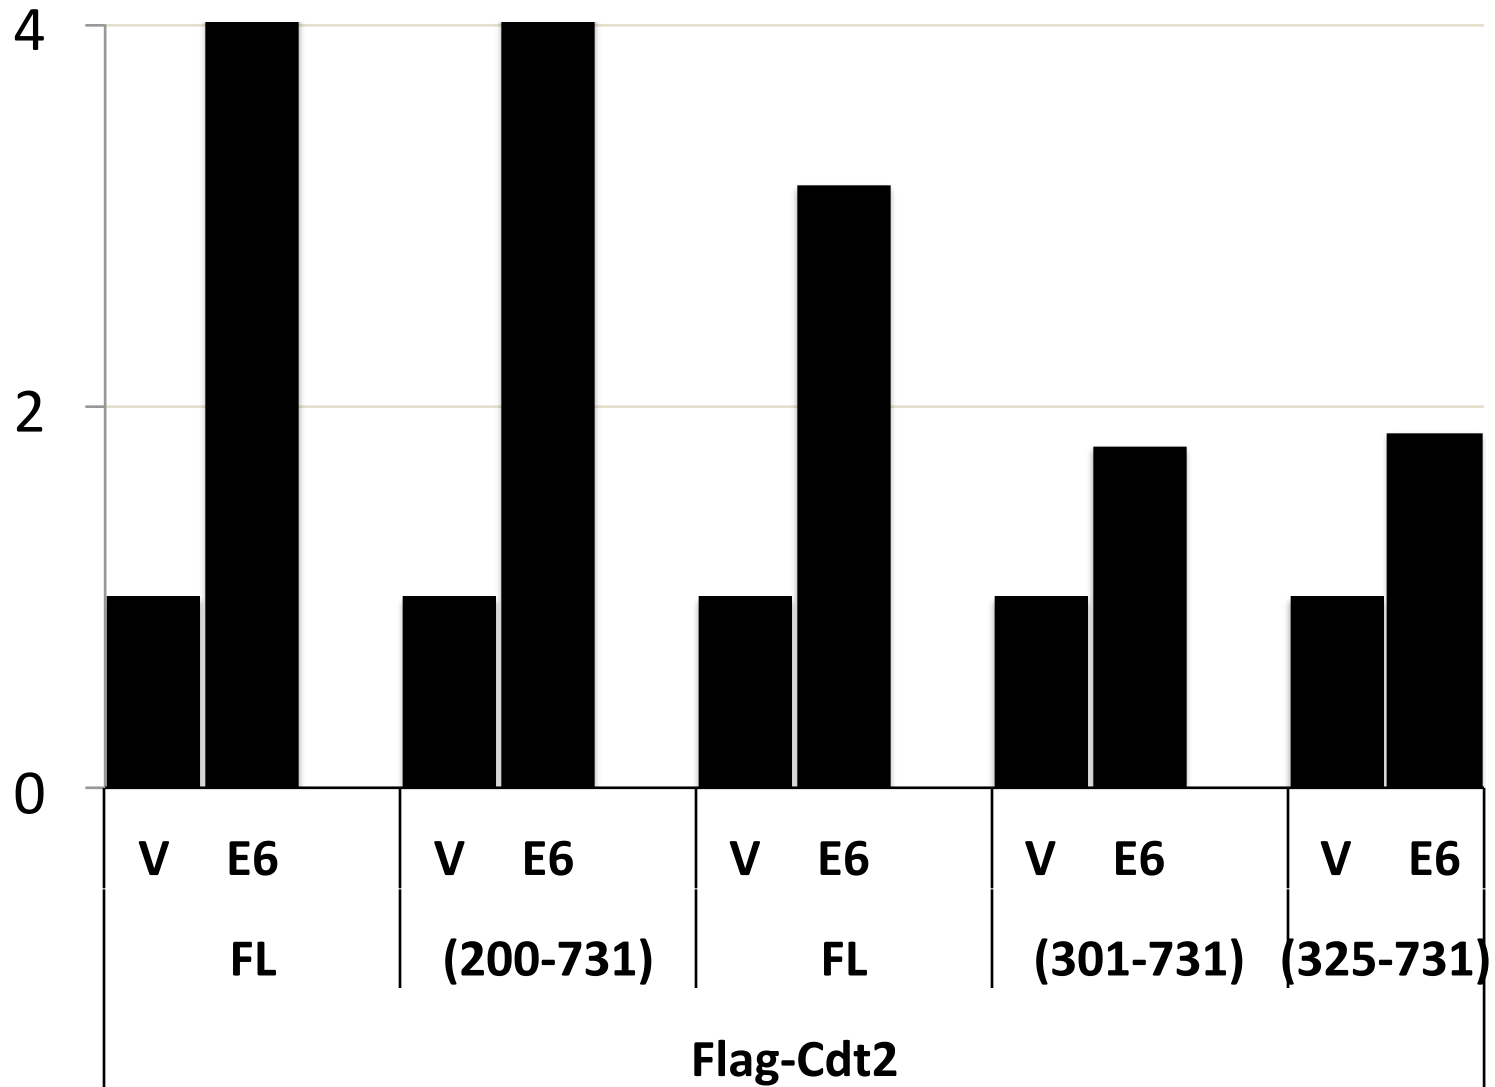

FIG-5F

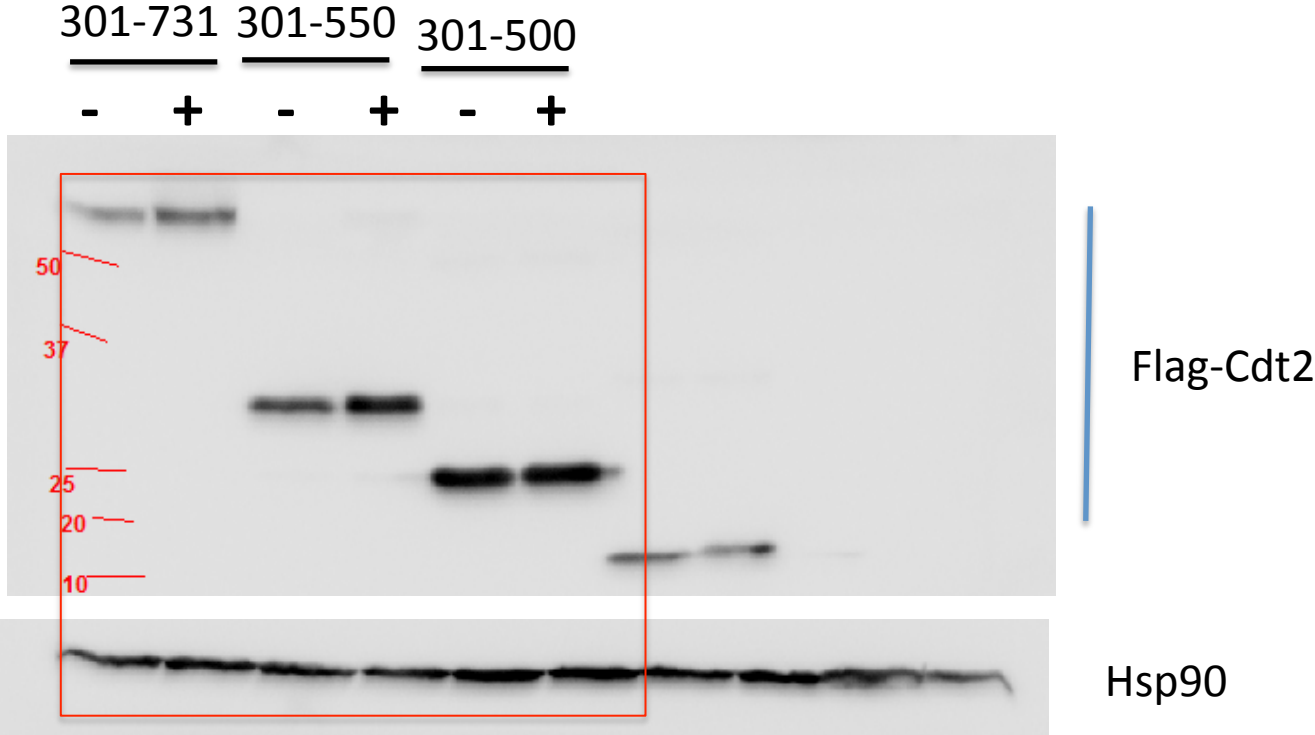

Quantifications  
presented in the main figure

FIG-5H

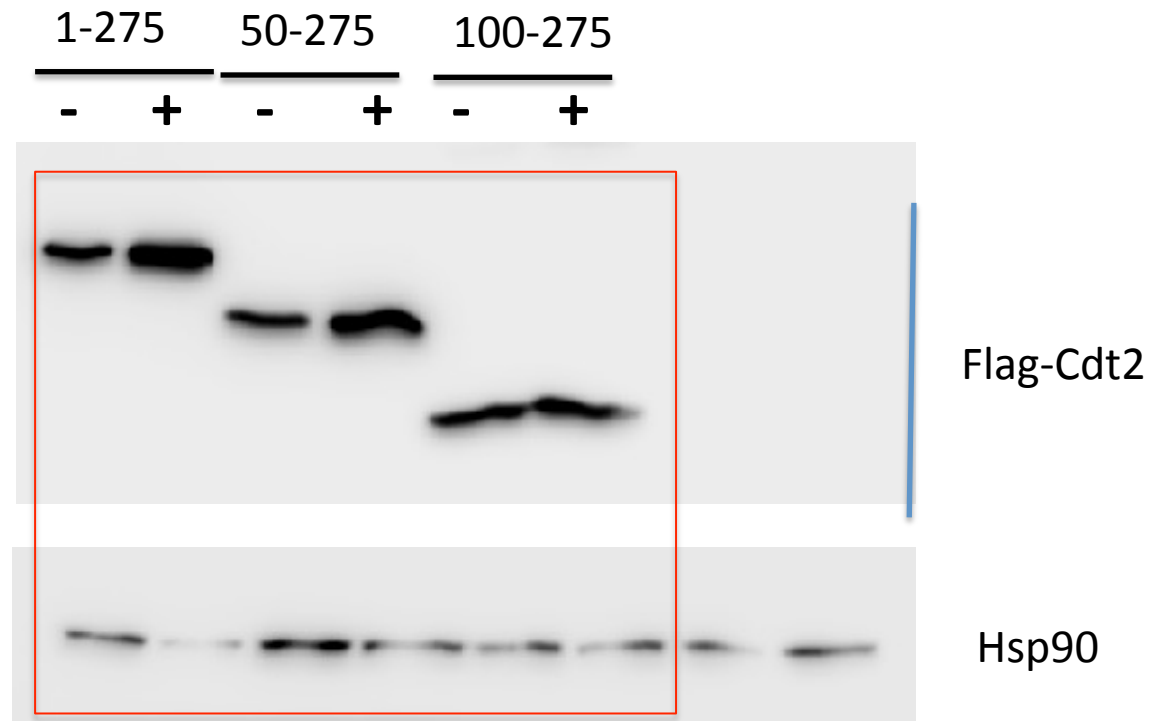

Quantifications  
presented in the main figure
